# Supplementary material
Source: publisher figshare collection journal article supplement (https://acs.figshare.com/ndownloader/files/4704133)
Supplement: Supplementary file 1 [file 4704133]

Support information

**On-line investigation of laser-induced aggregation and  
photo-activation of CdTe quantum dots by fluorescence correlation  
spectroscopy**

Chaoqing Dong, Huifeng Qian, Nenghu Fang, Jicun Ren\*

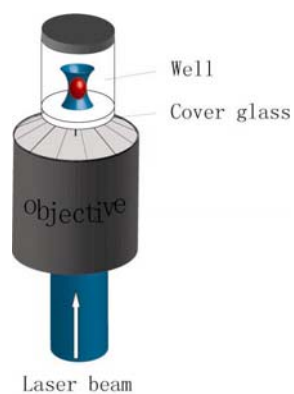

Figure S-1. The schematic diagram of small well used for detection chamber of FCS experiments.
